# Supplementary material
Source: Research Square preprint supplement (doi:10.21203/rs.3.rs-9586791/v1)
Supplement: Supplementary file 1 [file 8a721d164245f0ceadc6e00b.docx]

**Supplementary Material**

**Table S1. Regional total distribution volume (VT) estimates derived from 1TCM and 2TCM kinetic modeling using [18F]MAGL-2102 PET data. Data are presented as mean ± standard deviation (n = 6), with standard error (SE).**

| VOI | 1TCM  VT (mL/cm3) [SE (%)] | 2TCM  VT (mL/cm3) [SE (%)] |
| --- | --- | --- |
| Brainstem | 0.04 ± 0.00 [3.1 ± 0.9] | 0.04 ± 0.01 [3.0 ± 2.1] |
| White matter | 0.08 ± 0.02 [2.7 ± 0.9] | 0.10 ± 0.03 [2.7 ± 1.9] |
| Cerebellum | 0.12 ± 0.04 [2.9 ± 1.2] | - |
| Insula | 0.14 ± 0.06 [9.9 ± 12.6] | 0.14 ± 0.06 [12.5 ± 14.0] |
| Thalamus | 0.10 ± 0.02 [4.8 ± 1.9] | - |
| Basal Ganglia | 0.51 ± 0.99 [219.0 ± 494.3] | 0.98 ± 2.14 [737.9 ± 1745.8] |
| Amygdala | 0.18 ± 0.14 [75.5 ± 100.8] | - |
| Hippocampus | 0.09 ± 0.03 [5.4 ± 3.5] | 0.09 ± 0.03 [218.9 ± 505.6] |
| Posterior Cingulate | 0.15 ± 0.05 [3.9 ± 4.7] | - |
| Anterior Cingulate | 0.12 ± 0.03 [5.1 ± 5.9] | - |
| Occipital Lobe | 0.13 ± 0.02 [1.9 ± 1.2] | 0.15 ± 0.04 [2.5 ± 1.7] |
| Parietal Lobe | 0.14 ± 0.03 [2.6 ± 2.7] | 0.14 ± 0.03 [7.9 ± 10.0] |
| Temporal Lobe | 0.13 ± 0.03 [2.2 ± 1.5] | 0.17 ± 0.09 [20.0 ± 30.5] |
| Frontal Lobe | 0.15 ± 0.05 [5.7 ± 8.3] | - 1. 0.05 [7.2 ± 10.3] |

*- Note: The 2TCM fit was not stable in this region, suggesting limited model identifiability.*

**Table S2. Estimated organ-absorbed doses and whole-body effective dose of [¹⁸F]MAGL-2102 in one male and one female participant, as determined from whole-body PET/CT imaging and OLINDA/EXM (version 2.3) dosimetry analysis.**

| **Participant Sex** | **Male** | **Female** |
| --- | --- | --- |
| **Effective Dose** | 2.1 | 3.1 |
| **Target Organ (µSv/MBq)** | | |
| Brain | 5.7 | 9.6 |
| Eyes | 10.0 | 11.8 |
| Breast | - | 12.0 |
| Salivary Glands | 11.6 | 12.6 |
| Thyroid | 12.1 | 13.2 |
| Esophagus | 12.7 | 15.8 |
| Thymus | 12.6 | 15.8 |
| Urinary Bladder | 13.8 | 16.0 |
| Small Intestines | 14.6 | 16.3 |
| Rectum | 14.0 | 16.4 |
| Osteogenic Cells | 13.8 | 16.4 |
| Lungs | 10.5 | 16.5 |
| Ovaries | - | 16.6 |
| Stomach Wall | 14.0 | 17.1 |
| Right colon | 15.1 | 17.7 |
| Left colon | 18.0 | 31.0 |
| Kidneys | 14.7 | 17.8 |
| Uterus | - | 19.8 |
| Testes | 10.8 | - |
| Prostate | 13.8 | - |
| Pancreas | 15.2 | 20.1 |
| Red marrow | 14.4 | 21.1 |
| Adrenals | 15.5 | 21.3 |
| Spleen | 15.8 | 25.6 |
| Heart Wall | 18.9 | 29.3 |
| Liver | 22.8 | 39.5 |
| Gall Bladder | 45.6 | 81.3 |
| Total Body | 12.2 | 15.1 |
